# Supplementary material for: Association of Monogenic vs Polygenic Hypercholesterolemia With Risk of Atherosclerotic Cardiovascular Disease
Source: PubMed Central journal article supplement (PMC7042820; doi:10.1001/jamacardio.2019.5954), 2020-02-12
Supplement: jamacardiol-5-390-s001.pdf [file jamacardiol-5-390-s001.pdf]

## Supplementary Online Content

Trinder M, Francis GA, Brunham LR. Association of monogenic vs polygenic hypercholesterolemia with risk of atherosclerotic cardiovascular disease. *JAMA Cardiol*. Published online February 12, 2020. doi:10.1001/jamacardio.2019.5954

### **eMethods.**

**eTable 1.** Serum Biochemistry Assay Details

**eTable 2.** Coding Events Used for Coronary and Carotid Revascularization Procedures

**eTable 3.** Single Nucleotide Variants Used for Determining LDL-C Polygenic Scores

**eTable 4.** Baseline Characteristics of UK Biobank Participants at the Time of Study Enrollment

**eTable 5.** FH-causing Variants Identified in the LDLR, APOB, and PCSK9 Genes

**eTable 6.** Baseline Characteristics of UK Biobank Participants in the Exome Sequencing Cohort Stratified by Monogenic FH

**eFigure 1.** Classification of Patients by Genetic Ancestry Superpopulation

**eFigure 2.** Percent Variance in LDL-C Levels Explained by Single-Nucleotide Variants (SNVs) in the LDL-C Polygenic Score

**eFigure 3.** Measured Levels of LDL-C Versus Decile of LDL-C Polygenic Score Percentile

**eFigure 4.** LDL-C Polygenic Scores are Associated With Risk of CVD Among the East Asian and European Superpopulations

**eFigure 5.** Impact of ClinVar Pathogenic Versus Predicted FH-causing Variants on Premature CVD Events

**eFigure 6.** Impact of Monogenic FH-causing Variants on CVD Events

**eFigure 7.** Hypercholesterolemia is Underdiagnosed and Undertreated

### **eReferences.**

This supplementary material has been provided by the authors to give readers additional information about their work.

## **eMethods**

### *LDL-C polygenic score.*

The percent variance of LDL-C levels explained by the LDL-C polygenic as assessed by stepwise addition of the 223 SNVs into multivariable linear regression models with LDL-C levels as the dependent variable. The linear regression models were adjusted for age, sex, the first 4 principal components of genetic ancestry, and genotyping array and batch. SNVs were added in the order displayed in Online-Only Table 2 (from largest-to-smallest absolute effect size). The percent variance in LDL-C explained versus number of SNVs in the model were assessed using an exponential plateau model with Prism 8 software (GraphPad Software, Inc.)

### *Serum biochemistry analyses.*

The detailed description of the serum biochemistry analyses have been described ([http://biobank.ndph.ox.ac.uk/showcase/showcase/docs/serum\\_biochemistry.pdf](http://biobank.ndph.ox.ac.uk/showcase/showcase/docs/serum_biochemistry.pdf) and [http://biobank.ndph.ox.ac.uk/showcase/showcase/docs/serum\\_hb1ac.pdf](http://biobank.ndph.ox.ac.uk/showcase/showcase/docs/serum_hb1ac.pdf)). All serum biochemistry results described were performed using the Beckman Coulter AU5800 platform (Beckman Coulter (UK), Ltd) other than hemoglobin A1c, which was performed using Bio-Rad Variant II Turbo analysers (Bio-Rad Laboratories, Inc.). The general details for each assay are displayed in Online Only Table 1. Results for serum biochemistry are reported for samples obtained at the time of study enrolment unless otherwise stated.

### *Definition of CVD events.*

A detailed description of the UK Biobank's algorithm for identifying an individual's first myocardial infarction or stroke event have been described (myocardial infarction:

[http://biobank.ndph.ox.ac.uk/showcase/showcase/docs/alg\\_outcome\\_mi.pdf](http://biobank.ndph.ox.ac.uk/showcase/showcase/docs/alg_outcome_mi.pdf); stroke:

[http://biobank.ndph.ox.ac.uk/showcase/showcase/docs/alg\\_outcome\\_stroke.pdf](http://biobank.ndph.ox.ac.uk/showcase/showcase/docs/alg_outcome_stroke.pdf)).

## ONLINE-ONLY TABLES

**eTable 1. Serum Biochemistry Assay Details**

| Serum assay                | Assay Manufacturer         | Analytical Platform                | Analysis Methodology                   | Reported Units | Manufacturer's Analytical Range for Reported Units | Measurement Conversion |
|----------------------------|----------------------------|------------------------------------|----------------------------------------|----------------|----------------------------------------------------|------------------------|
| Total cholesterol (mg/dL)  | Beckman Coulter (UK), Ltd  | Beckman Coulter AU5800             | Enzymatic                              | mmol/L         | 0.5 - 18                                           | x 38.67                |
| Direct LDL-C (mg/dL)       | Beckman Coulter (UK), Ltd  | Beckman Coulter AU5800             | Enzymatic Selective Protection         | mmol/L         | 0.26 -10.3                                         | x 38.67                |
| Apolipoprotein B (mg/dL)   | Beckman Coulter (UK), Ltd  | Beckman Coulter AU5800             | Immuno-turbidimetric                   | g/L            | 0.4 - 2                                            | x 100                  |
| Triglycerides (mg/dL)      | Beckman Coulter (UK), Ltd  | Beckman Coulter AU5800             | Enzymatic                              | mmol/L         | 0.1 - 11.3                                         | x 88.57                |
| HDL-C (mg/dL)              | Beckman Coulter (UK), Ltd  | Beckman Coulter AU5800             | Enzyme Immuno-inhibition               | mmol/L         | 0.05 - 4.65                                        | x 38.67                |
| Apolipoprotein A1 (mg/dL)  | Beckman Coulter (UK), Ltd  | Beckman Coulter AU5800             | Immuno-turbidimetric                   | g/L            | 0.4 - 2.5                                          | x 100                  |
| Lipoprotein(a) (mg/dL)     | Randox Bioscience, UK      | Beckman Coulter AU5800             | Immuno-turbidimetric                   | nmol/L         | 5.76 - 189                                         | / 2.4                  |
| Hemoglobin A1c (%)         | Bio-Rad Laboratories, Inc. | Bio-Rad Variant II Turbo analysers | High Performance Liquid Chromatography | mmol/mol       | 15 - 184                                           | (x 0.09148) + 2.152    |
| C-reactive protein (mg/dL) | Beckman Coulter (UK), Ltd  | Beckman Coulter AU5800             | Immuno-turbidimetric                   | mg/L           | 0.08 - 80                                          | / 10                   |

The measurement conversion describes the calculation used to convert reported units into the units described for the serum assay results. HDL-C: high-density lipoprotein cholesterol; LDL-C: low-density lipoprotein cholesterol.

**eTable 2. Coding Events Used for Coronary and Carotid Revascularization Procedures**

| Coronary and Carotid Revascularization Procedures                                                                                                                | Coding - Definition                                                                                                                                                                                                                                                                                                                                                                                                                                                                                                                                                                                                                                                                                                                                                                                                                                                                                                                                                                                                                                                                                                                                                                                                                                                                                                                      |
|------------------------------------------------------------------------------------------------------------------------------------------------------------------|------------------------------------------------------------------------------------------------------------------------------------------------------------------------------------------------------------------------------------------------------------------------------------------------------------------------------------------------------------------------------------------------------------------------------------------------------------------------------------------------------------------------------------------------------------------------------------------------------------------------------------------------------------------------------------------------------------------------------------------------------------------------------------------------------------------------------------------------------------------------------------------------------------------------------------------------------------------------------------------------------------------------------------------------------------------------------------------------------------------------------------------------------------------------------------------------------------------------------------------------------------------------------------------------------------------------------------------|
| Baseline medical history                                                                                                                                         | <ul style="list-style-type: none"> <li>• 1069 – Heart surgery</li> <li>• 1070 – Coronary angioplasty</li> <li>• 1095 – Coronary artery bypass grafts (CABG)</li> <li>• 1105 – Carotid artery surgery/endarterectomy</li> </ul>                                                                                                                                                                                                                                                                                                                                                                                                                                                                                                                                                                                                                                                                                                                                                                                                                                                                                                                                                                                                                                                                                                           |
| Post-enrollment procedures during hospitalization (Office of Population Censuses and Surveys Classification of Interventions and Procedures, version 4 [OPCS-4]) | <ul style="list-style-type: none"> <li>• K40 – Saphenous vein graft replacement of coronary artery</li> <li>• K41 – Other autograft replacement of coronary artery</li> <li>• K42 – Allograft replacement of coronary artery</li> <li>• K43 – Prosthetic replacement of coronary artery</li> <li>• K44 – Other replacement of coronary artery</li> <li>• K45 – Connection of thoracic artery to coronary artery</li> <li>• K46 – Other bypass of coronary artery</li> <li>• K49 – Transluminal balloon angioplasty of coronary artery</li> <li>• K50 – Other therapeutic transluminal operations on coronary artery</li> <li>• K55.3 – Open removal of cardiac thrombus</li> <li>• K75 – Percutaneous transluminal balloon angioplasty and insertion of stent into coronary artery</li> <li>• K76 – Transluminal operations on cardiac conduit</li> <li>• L29 – Reconstruction of carotid artery</li> <li>• L30.3 – Open embolectomy of carotid artery</li> <li>• L31.1 – Percutaneous transluminal angioplasty of carotid artery</li> <li>• L31.3 – Endovascular repair of carotid</li> <li>• L31.4 – Percutaneous transluminal insertion of stent into carotid artery</li> <li>• L31.8 – Other specified transluminal operations on carotid artery</li> <li>• L31.9 – Unspecified transluminal operations on carotid artery</li> </ul> |

**eTable 3. Single Nucleotide Variants Used for Determining LDL-C Polygenic Scores**

| <b>Locus</b>   | <b>Chr:Pos</b> | <b>rsID</b> | <b>Initial Description</b> | <b>Annotation</b> | <b>EA/NEA</b> | <b>EAF</b> | <b>Beta</b> |
|----------------|----------------|-------------|----------------------------|-------------------|---------------|------------|-------------|
| <i>LDLR</i>    | 19:11202306    | rs6511720   | GLGC2013                   | Intron            | T/G           | 0.1075     | -0.211427   |
| NA             | 19:45422946    | rs4420638   | GLGC2013                   | Intergenic        | G/A           | 0.1797     | 0.16801     |
| <i>CELSR2</i>  | 1:109818306    | rs629301    | GLGC2013                   | Utr3              | T/G           | 0.7742     | 0.157518    |
| NA             | 20:17845921    | rs2328223   | GLGC2013                   | Intergenic        | C/A           | 0.2244     | 0.140       |
| <i>APOB</i>    | 2:21263900     | rs1367117   | GLGC2013                   | Nonsynonymous     | A/G           | 0.2844     | 0.105       |
| <i>APOH</i>    | 17:64210580    | rs1801689   | GLGC2013                   | Nonsynonymous     | C/A           | 0.02673    | 0.104       |
| <i>SUGP1</i>   | 19:19407718    | rs10401969  | GLGC2013                   | Intron            | C/T           | 0.08456    | -0.089559   |
| <i>ABCG8</i>   | 2:44072576     | rs4299376   | GLGC2013                   | Intron            | T/G           | 0.7127     | -0.07030    |
| <i>HPR</i>     | 16:72108093    | rs2000999   | GLGC2013                   | Intron            | A/G           | 0.2003     | 0.06302     |
| NA             | 8:9183358      | rs9987289   | GLGC2013                   | Intergenic        | G/A           | 0.8993     | 0.056878    |
| NA             | 2:118835841    | rs10490626  | GLGC2013                   | Intergenic        | A/G           | 0.06783    | -0.053409   |
| <i>FADS1</i>   | 11:61569830    | rs174546    | GLGC2013                   | Utr3              | T/C           | 0.3121     | -0.053333   |
| NA             | 8:126490972    | rs2954029   | GLGC2013                   | Intergenic        | T/A           | 0.4468     | -0.0476     |
| <i>SLC22A1</i> | 6:160578860    | rs1564348   | GLGC2013                   | Intron            | C/T           | 0.1517     | 0.047474    |
| NA             | 1:55504650     | rs2479409   | GLGC2013                   | Intergenic        | A/G           | 0.6582     | -0.046614   |
| <i>DOCK7</i>   | 1:63025942     | rs2131925   | GLGC2013                   | Intron            | T/G           | 0.6477     | 0.044479    |
| <i>HFE</i>     | 6:26093141     | rs1800562   | GLGC2013                   | Nonsynonymous     | A/G           | 0.0479     | -0.044136   |
| <i>ST3GAL4</i> | 11:126243952   | rs11220462  | GLGC2013                   | Intron            | A/G           | 0.1453     | 0.042734    |
| NA             | 7:25991826     | rs4722551   | GLGC2013                   | Intergenic        | C/T           | 0.1577     | 0.039910    |
| <i>TIMD4</i>   | 5:156390297    | rs6882076   | GLGC2013                   | Upstream          | C/T           | 0.626      | 0.039039    |
| NA             | 11:116648917   | rs964184    | GLGC2013                   | Intergenic        | C/G           | 0.8478     | -0.03699    |
| <i>VLDLR</i>   | 9:2640759      | rs3780181   | GLGC2013                   | Intron            | G/A           | 0.07446    | -0.036964   |
| <i>HNF1A</i>   | 12:121416650   | rs1169288   | GLGC2013                   | Nonsynonymous     | C/A           | 0.3325     | 0.03660     |
| <i>TOP1</i>    | 20:39672618    | rs6029526   | GLGC2013                   | Intron            | A/T           | 0.5095     | 0.035212    |
| <i>HLA-DRA</i> | 6:32412435     | rs3177928   | GLGC2013                   | Utr3              | A/G           | 0.1409     | 0.0349      |
| NA             | 6:16127407     | rs3757354   | GLGC2013                   | Intergenic        | T/C           | 0.24403    | -0.03343    |
| <i>CMTM6</i>   | 3:32533010     | rs7640978   | GLGC2013                   | Intron            | T/C           | 0.09258    | -0.0331     |
| <i>DNAH11</i>  | 7:21607352     | rs12670798  | GLGC2013                   | Intron            | C/T           | 0.2471     | 0.032799    |
| NA             | 16:56993324    | rs3764261   | GLGC2013                   | Intergenic        | A/C           | 0.3127     | -0.03244    |

|          |              |             |          |               |     |          |            |          |           |
|----------|--------------|-------------|----------|---------------|-----|----------|------------|----------|-----------|
| NA       | 8:55421614   | rs10102164  | GLGC2013 | Intergenic    | A/G | 0.202    | 0.0309521  | 0.003265 | 2.58E-21  |
| NA       | 1:27138393   | rs12748152  | GLGC2013 | Intergenic    | T/C | 0.07209  | 0.0306381  | 0.005127 | 2.29E-09  |
| GPAM     | 10:113933886 | rs2255141   | GLGC2013 | Intron        | G/A | 0.7281   | -0.02792   | 0.002982 | 7.68E-21  |
| NA       | 8:59388565   | rs2081687   | GLGC2013 | Intergenic    | C/T | 0.6624   | -0.0276358 | 0.002789 | 3.76E-23  |
| TMEM57   | 1:25775733   | rs12027135  | GLGC2013 | Intron        | T/A | 0.5089   | 0.0272454  | 0.002663 | 1.44E-24  |
| NA       | 12:112072424 | rs11065987  | GLGC2013 | Intergenic    | G/A | 0.3804   | -0.02598   | 0.002932 | 8.01E-19  |
| PLEC     | 8:145043543  | rs11136341  | GLGC2013 | Intron        | G/A | 0.3768   | 0.0256472  | 0.003484 | 1.83E-13  |
| MTMR3    | 22:30378703  | rs5763662   | GLGC2013 | Intron        | T/C | 0.03132  | 0.0254959  | 0.008161 | 1.78E-03  |
| ANXA9    | 1:150958836  | rs267733    | GLGC2013 | Nonsynonymous | G/A | 0.1366   | -0.0253057 | 0.003861 | 5.59E-11  |
| NYNRIN   | 14:24883887  | rs8017377   | GLGC2013 | Nonsynonymous | A/G | 0.4228   | 0.02263    | 0.002705 | 6.03E-17  |
| BRCA2    | 13:32953388  | rs4942486   | GLGC2013 | Intron        | C/T | 0.5158   | -0.0215512 | 0.002653 | 4.48E-16  |
| NA       | 17:7091650   | rs314253    | GLGC2013 | Intergenic    | C/T | 0.3507   | -0.01959   | 0.002753 | 1.10E-12  |
| NA       | 20:12962718  | rs364585    | GLGC2013 | Intergenic    | G/A | 0.6361   | 0.0187598  | 0.00284  | 3.99E-11  |
| DNAJC13  | 3:132163200  | rs17404153  | GLGC2013 | Intron        | T/G | 0.1261   | -0.0182777 | 0.004074 | 7.26E-06  |
| PPARA    | 22:46627603  | rs4253772   | GLGC2013 | Intron        | T/C | 0.09758  | 0.018203   | 0.004683 | 1.01E-04  |
| CSNK1G3  | 5:122855416  | rs4530754   | GLGC2013 | Intron        | A/G | 0.5536   | 0.0169497  | 0.002771 | 9.50E-10  |
| NA       | 2:121309488  | rs2030746   | GLGC2013 | Intergenic    | T/C | 0.4127   | 0.01389    | 0.002665 | 1.88E-07  |
| DOK7     | 4:3473139    | rs6831256   | GLGC2013 | Intron        | G/A | 0.4412   | 0.01266    | 0.002679 | 2.28E-06  |
| JAK2     | 9:5073770    | rs77375493  | MVP      | Nonsynonymous | T/G | 0.001137 | -0.2952    | 0.048864 | 1.54E-09  |
| ZNF574   | 19:42584958  | rs201596848 | MVP      | Nonsynonymous | T/C | 0.001363 | -0.2553608 | 0.036965 | 4.91E-12  |
| HIST1H1B | 6:27835293   | rs201148465 | MVP      | Synonymous    | C/A | 0.001378 | 0.2098     | 0.037634 | 2.49E-08  |
| FGB      | 4:155489608  | rs6054      | MVP      | Nonsynonymous | T/C | 0.003804 | 0.0910444  | 0.021773 | 2.90E-05  |
| ZFPM1    | 16:88580796  | rs147032017 | MVP      | Synonymous    | T/C | 0.006487 | -0.0906348 | 0.016925 | 8.56E-08  |
| SERPINA1 | 14:94844947  | rs28929474  | MVP      | Nonsynonymous | T/C | 0.01536  | 0.08124    | 0.010758 | 4.30E-14  |
| NA       | 9:136155000  | rs635634    | MVP      | Intergenic    | T/C | 0.1904   | 0.0773341  | 0.003486 | 4.88E-109 |
| NA       | 6:39246856   | rs2758873   | MVP      | Intergenic    | A/G | 0.237758 | 0.0738191  | 0.03972  | 6.31E-02  |
| HMGCR    | 5:74655726   | rs3846663   | MVP      | Intron        | T/C | 0.3977   | 0.0656162  | 0.002748 | 5.11E-126 |
| RAB21    | 12:72179446  | rs61754230  | MVP      | Nonsynonymous | T/C | 0.01507  | 0.0573498  | 0.010816 | 1.14E-07  |
| A1CF     | 10:52573772  | rs41274050  | MVP      | Nonsynonymous | T/C | 0.007148 | 0.0570591  | 0.015688 | 2.76E-04  |
| HNF4A    | 20:43042364  | rs1800961   | MVP      | Nonsynonymous | T/C | 0.03085  | -0.05428   | 0.007587 | 8.45E-13  |
| NA       | 7:150529449  | rs17173637  | MVP      | Intergenic    | C/T | 0.1449   | 0.0457748  | 0.046854 | 3.29E-01  |

|                  |              |            |     |               |     |         |            |          |          |
|------------------|--------------|------------|-----|---------------|-----|---------|------------|----------|----------|
| <i>PXK</i>       | 3:58381287   | rs13315871 | MVP | Intron        | A/G | 0.08472 | -0.0383928 | 0.004888 | 4.02E-15 |
| <i>SLC39A8</i>   | 4:103188709  | rs13107325 | MVP | Nonsynonymous | T/C | 0.05057 | -0.0345177 | 0.006053 | 1.18E-08 |
| <i>EVI5</i>      | 1:93009438   | rs7515577  | MVP | Intron        | A/C | 0.8166  | 0.0302476  | 0.003455 | 2.05E-18 |
| <i>FUT2</i>      | 19:49206417  | rs492602   | MVP | Synonymous    | G/A | 0.4502  | 0.028327   | 0.002831 | 1.45E-23 |
| <i>RPS6</i>      | 9:19376255   | rs67710536 | MVP | Utr3          | C/A | 0.1111  | 0.0282728  | 0.004458 | 2.27E-10 |
| <i>CD300LG</i>   | 17:41926126  | rs72836561 | MVP | Nonsynonymous | T/C | 0.02753 | -0.02729   | 0.008014 | 6.62E-04 |
| <i>KPNB1</i>     | 17:45732774  | rs11871606 | MVP | Intron        | A/C | 0.5019  | -0.0271453 | 0.002649 | 1.22E-24 |
| <i>MOSC1</i>     | 1:220970028  | rs2642438  | MVP | Nonsynonymous | G/A | 0.7619  | 0.02622    | 0.00793  | 9.46E-04 |
| <i>FAM117B</i>   | 2:203532304  | rs11694172 | MVP | Intron        | G/A | 0.1548  | -0.0254615 | 0.045714 | 5.78E-01 |
| NA               | 6:135411228  | rs9376090  | MVP | Intergenic    | C/T | 0.2377  | -0.0251724 | 0.003155 | 1.48E-15 |
| <i>SPTY2D1</i>   | 11:18632984  | rs10128711 | MVP | Intron        | C/T | 0.6911  | 0.02502    | 0.003254 | 1.48E-14 |
| <i>UNK</i>       | 17:73782191  | rs2125345  | MVP | Intron        | C/T | 0.3126  | -0.0242084 | 0.002982 | 4.74E-16 |
| <i>ABCA1</i>     | 9:107664301  | rs1883025  | MVP | Intron        | T/C | 0.2623  | -0.02412   | 0.002991 | 7.24E-16 |
| <i>C20orf173</i> | 20:34116282  | rs7261862  | MVP | Nonsynonymous | C/T | 0.1768  | -0.023574  | 0.003492 | 1.47E-11 |
| <i>GCKR</i>      | 2:27730940   | rs1260326  | MVP | Nonsynonymous | C/T | 0.6287  | -0.02315   | 0.002778 | 7.76E-17 |
| <i>TMPRSS11E</i> | 4:69343287   | rs976002   | MVP | Nonsynonymous | G/A | 0.2259  | 0.022859   | 0.003272 | 2.84E-12 |
| <i>PHC1</i>      | 12:9082581   | rs4883201  | MVP | Intron        | G/A | 0.115   | -0.02204   | 0.004161 | 1.18E-07 |
| NA               | 8:18272881   | rs1495741  | MVP | Intergenic    | A/G | 0.7527  | -0.021635  | 0.003089 | 2.48E-12 |
| <i>VTN</i>       | 17:26694861  | rs704      | MVP | Nonsynonymous | A/G | 0.4864  | 0.0214349  | 0.002647 | 5.58E-16 |
| <i>RAF1</i>      | 3:12628920   | rs2290159  | MVP | Intron        | C/G | 0.204   | -0.0212431 | 0.003893 | 4.87E-08 |
| <i>ABCB11</i>    | 2:169830155  | rs2287623  | MVP | Intron        | A/G | 0.5921  | -0.0208912 | 0.002699 | 1.00E-14 |
| <i>TBC1D8</i>    | 2:101627925  | rs1062062  | MVP | Nonsynonymous | T/C | 0.1234  | -0.02069   | 0.004216 | 9.26E-07 |
| <i>FAM24B</i>    | 10:124610027 | rs1891110  | MVP | Nonsynonymous | A/G | 0.5487  | 0.0205575  | 0.002645 | 7.69E-15 |
| <i>PDXDC1</i>    | 16:15129940  | rs3198697  | MVP | Synonymous    | T/C | 0.3988  | -0.02055   | 0.034098 | 5.47E-01 |
| NA               | 18:47160953  | rs7241918  | MVP | Intergenic    | T/G | 0.8481  | 0.0204613  | 0.003704 | 3.32E-08 |
| NA               | 5:131744574  | rs1016988  | MVP | Intergenic    | C/T | 0.2223  | -0.019644  | 0.003195 | 7.81E-10 |
| NA               | 14:71096344  | rs9646133  | MVP | Intergenic    | T/G | 0.3263  | -0.0189208 | 0.002831 | 2.35E-11 |
| <i>NF1</i>       | 17:29629326  | rs11080150 | MVP | Intron        | G/A | 0.3257  | -0.0188852 | 0.002822 | 2.19E-11 |
| <i>SLC25A17</i>  | 22:41170063  | rs2076674  | MVP | Intron        | C/T | 0.3538  | 0.0183521  | 0.002824 | 8.08E-11 |
| <i>TSPYL6</i>    | 2:54482553   | rs17189743 | MVP | Nonsynonymous | A/G | 0.02832 | 0.01822    | 0.007927 | 2.15E-02 |
| NA               | 6:52453220   | rs2239619  | MVP | Intergenic    | A/C | 0.619   | 0.0180313  | 0.002769 | 7.42E-11 |

|                 |              |            |     |               |     |         |            |          |          |
|-----------------|--------------|------------|-----|---------------|-----|---------|------------|----------|----------|
| <i>C7orf50</i>  | 7:1083777    | rs1997243  | MVP | Intron        | G/A | 0.1426  | 0.01803    | 0.00378  | 1.85E-06 |
| <i>FGFR4</i>    | 5:176520243  | rs351855   | MVP | Nonsynonymous | A/G | 0.292   | -0.01803   | 0.003282 | 3.94E-08 |
| <i>PNPLA3</i>   | 22:44324727  | rs738409   | MVP | Nonsynonymous | G/C | 0.2313  | -0.01796   | 0.003135 | 1.00E-08 |
| <i>SEC16A</i>   | 9:139368953  | rs3812594  | MVP | Nonsynonymous | A/G | 0.2375  | -0.0178008 | 0.003146 | 1.54E-08 |
| <i>CCDC109A</i> | 10:74637326  | rs7901016  | MVP | Intron        | C/T | 0.06978 | -0.0177426 | 0.005719 | 1.92E-03 |
| <i>C14orf43</i> | 14:74250126  | rs13379043 | MVP | Intron        | C/T | 0.3053  | -0.0177218 | 0.002961 | 2.16E-09 |
| NA              | 6:34546560   | rs2814982  | MVP | Intergenic    | T/C | 0.1196  | -0.0167865 | 0.004097 | 4.19E-05 |
| <i>JMJD1C</i>   | 10:65027610  | rs10761731 | MVP | Intron        | T/A | 0.4199  | 0.01674    | 0.002687 | 4.63E-10 |
| <i>PGS1</i>     | 17:76403984  | rs4129767  | MVP | Intron        | A/G | 0.4879  | 0.0165082  | 0.002641 | 4.06E-10 |
| NA              | 10:94839642  | rs2068888  | MVP | Intergenic    | A/G | 0.4701  | -0.0163534 | 0.002673 | 9.47E-10 |
| NA              | 6:31265490   | rs2247056  | MVP | Intergenic    | C/T | 0.765   | 0.016079   | 0.003538 | 5.49E-06 |
| <i>DOCK6</i>    | 19:11347493  | rs737337   | MVP | Synonymous    | C/T | 0.1197  | -0.015796  | 0.004326 | 2.61E-04 |
| <i>PNLIPRP2</i> | 10:118397971 | rs10885997 | MVP | Nonsynonymous | G/A | 0.4093  | 0.0154428  | 0.002888 | 8.91E-08 |
| <i>TOM1</i>     | 22:35711098  | rs138777   | MVP | Intron        | G/A | 0.6172  | -0.01544   | 0.002878 | 8.19E-08 |
| <i>ZGPAT</i>    | 20:62349586  | rs4809330  | MVP | Intron        | G/A | 0.7005  | -0.0152932 | 0.002919 | 1.61E-07 |
| <i>ASAP3</i>    | 1:23766233   | rs1077514  | MVP | Intron        | T/C | 0.8219  | 0.0149723  | 0.003536 | 2.29E-05 |
| <i>TRPS1</i>    | 8:116599199  | rs2293889  | MVP | Intron        | G/T | 0.6204  | -0.0149623 | 0.00275  | 5.29E-08 |
| <i>EFNA1</i>    | 1:155106227  | rs4745     | MVP | Nonsynonymous | T/A | 0.4876  | -0.0148197 | 0.00272  | 5.11E-08 |
| <i>MPV17L2</i>  | 19:18304700  | rs874628   | MVP | Nonsynonymous | G/A | 0.2609  | 0.0145906  | 0.00302  | 1.36E-06 |
| <i>CYP4V2</i>   | 4:187120211  | rs13146272 | MVP | Nonsynonymous | A/C | 0.6231  | -0.01453   | 0.002723 | 9.50E-08 |
| NA              | 11:122522375 | rs7941030  | MVP | Intergenic    | C/T | 0.38    | 0.01445    | 0.002705 | 9.20E-08 |
| <i>C6orf97</i>  | 6:151901409  | rs4870044  | MVP | Intron        | T/C | 0.3408  | 0.0143991  | 0.002982 | 1.38E-06 |
| <i>TCEA2</i>    | 20:62695931  | rs6062343  | MVP | Intron        | A/G | 0.4322  | -0.0143458 | 0.002737 | 1.59E-07 |
| <i>ARHGEF15</i> | 17:8216468   | rs871841   | MVP | Nonsynonymous | C/T | 0.5191  | 0.0140764  | 0.002749 | 3.05E-07 |
| NA              | 7:72982874   | rs17145738 | MVP | Intergenic    | T/C | 0.1149  | 0.0138548  | 0.00418  | 9.18E-04 |
| <i>SNX13</i>    | 7:17911038   | rs10282707 | MVP | Intron        | T/C | 0.4261  | -0.0136602 | 0.003201 | 1.97E-05 |
| NA              | 9:16887366   | rs3927680  | MVP | Intergenic    | A/T | 0.5178  | -0.0131538 | 0.002747 | 1.68E-06 |
| NA              | 12:57809456  | rs1106766  | MVP | Intergenic    | T/C | 0.2121  | -0.01311   | 0.003249 | 5.48E-05 |
| <i>TMED6</i>    | 16:69385641  | rs76116020 | MVP | Nonsynonymous | G/A | 0.03279 | -0.0130922 | 0.007433 | 7.82E-02 |
| NA              | 1:182168885  | rs1689800  | MVP | Intergenic    | G/A | 0.3391  | 0.0129118  | 0.002784 | 3.53E-06 |
| NA              | 8:19844222   | rs12678919 | MVP | Intergenic    | G/A | 0.09741 | 0.0123     | 0.004464 | 5.87E-03 |



|                 |              |            |     |               |     |         |            |          |          |
|-----------------|--------------|------------|-----|---------------|-----|---------|------------|----------|----------|
| <i>PROX2</i>    | 14:75322794  | rs8014204  | MVP | Intron        | A/G | 0.5702  | 0.0121151  | 0.002813 | 1.66E-05 |
| NA              | 8:61548494   | rs626913   | MVP | Intergenic    | C/A | 0.5191  | 0.01188    | 0.002634 | 6.45E-06 |
| NA              | 2:113841030  | rs6734238  | MVP | Intergenic    | G/A | 0.3909  | -0.01183   | 0.002722 | 1.39E-05 |
| NA              | 10:17260290  | rs10904908 | MVP | Intergenic    | G/A | 0.4456  | 0.011618   | 0.002658 | 1.24E-05 |
| <i>MARCH8</i>   | 10:46013277  | rs970548   | MVP | Intron        | C/A | 0.2421  | 0.0113847  | 0.003087 | 2.26E-04 |
| NA              | 14:64235556  | rs7157785  | MVP | Intergenic    | T/G | 0.1773  | 0.01136    | 0.003761 | 2.53E-03 |
| <i>PCIF1</i>    | 20:44576502  | rs7679     | MVP | Utr3          | C/T | 0.1685  | 0.0110928  | 0.003539 | 1.72E-03 |
| <i>GAS6</i>     | 13:114527838 | rs7400722  | MVP | Intron        | A/G | 0.4203  | 0.0108984  | 0.003121 | 4.79E-04 |
| NA              | 3:135926622  | rs645040   | MVP | Intergenic    | T/G | 0.7818  | 0.0106915  | 0.003199 | 8.31E-04 |
| <i>SBNO1</i>    | 12:123796238 | rs4759375  | MVP | Intron        | T/C | 0.1087  | 0.0103686  | 0.005479 | 5.84E-02 |
| <i>STX4</i>     | 16:31048079  | rs10871454 | MVP | Intron        | T/C | 0.369   | -0.0100139 | 0.002924 | 6.16E-04 |
| <i>ADCY5</i>    | 3:123065778  | rs11708067 | MVP | Intron        | G/A | 0.2068  | -0.0097741 | 0.003322 | 3.26E-03 |
| <i>ERLIN1</i>   | 10:101912064 | rs2862954  | MVP | Nonsynonymous | C/T | 0.405   | 0.0096841  | 0.002789 | 5.16E-04 |
| NA              | 1:219687432  | rs2785990  | MVP | Intergenic    | T/C | 0.6852  | 0.0095037  | 0.002856 | 8.77E-04 |
| <i>PHLDB1</i>   | 11:118486067 | rs11603023 | MVP | Intron        | C/T | 0.5788  | -0.009488  | 0.002676 | 3.92E-04 |
| <i>SERPINF2</i> | 17:1648502   | rs2070863  | MVP | Nonsynonymous | T/C | 0.2128  | 0.0094815  | 0.003355 | 4.72E-03 |
| NA              | 5:55861786   | rs9686661  | MVP | Intergenic    | T/C | 0.1869  | 0.0094768  | 0.003374 | 4.98E-03 |
| <i>CECR5</i>    | 22:17625915  | rs35665085 | MVP | Nonsynonymous | A/G | 0.04979 | 0.0091775  | 0.006052 | 1.29E-01 |
| <i>DFNB31</i>   | 9:117166246  | rs2274159  | MVP | Nonsynonymous | G/A | 0.48    | 0.0090078  | 0.002666 | 7.30E-04 |
| <i>NSD1</i>     | 5:176637576  | rs28932178 | MVP | Nonsynonymous | C/T | 0.1679  | -0.008877  | 0.003608 | 1.39E-02 |
| <i>SLC22A18</i> | 11:2936952   | rs16928809 | MVP | Intron        | A/G | 0.08745 | -0.008583  | 0.004698 | 6.77E-02 |
| <i>AFF1</i>     | 4:88030261   | rs442177   | MVP | Intron        | T/G | 0.5731  | 0.008547   | 0.002674 | 1.39E-03 |
| <i>ANKS3</i>    | 16:4755108   | rs78074706 | MVP | Nonsynonymous | A/G | 0.02152 | 0.008417   | 0.009031 | 3.51E-01 |
| NA              | 6:43757896   | rs998584   | MVP | Intergenic    | A/C | 0.4824  | 0.008065   | 0.002752 | 3.39E-03 |
| <i>FCGR2A</i>   | 1:161479745  | rs1801274  | MVP | Nonsynonymous | G/A | 0.4842  | -0.0079908 | 0.003603 | 2.66E-02 |
| <i>DAGLB</i>    | 7:6449272    | rs702485   | MVP | Utr3          | G/A | 0.4633  | 0.0078124  | 0.033105 | 8.13E-01 |
| NA              | 11:10388782  | rs2923084  | MVP | Intergenic    | G/A | 0.2006  | 0.007712   | 0.003356 | 2.16E-02 |
| <i>PCNXL3</i>   | 11:65391317  | rs12801636 | MVP | Intron        | A/G | 0.2339  | 0.007643   | 0.003119 | 1.43E-02 |
| <i>ANGPTL4</i>  | 19:8433196   | rs7255436  | MVP | Intron        | A/C | 0.5207  | 0.0075534  | 0.002658 | 4.48E-03 |
| <i>UBE2L3</i>   | 22:21932068  | rs181362   | MVP | Intron        | T/C | 0.254   | -0.007346  | 0.003075 | 1.69E-02 |
| <i>PEMT</i>     | 17:17409560  | rs7946     | MVP | Nonsynonymous | T/C | 0.6667  | -0.00721   | 0.002916 | 1.34E-02 |

|                              |              |             |     |               |     |          |            |          |          |
|------------------------------|--------------|-------------|-----|---------------|-----|----------|------------|----------|----------|
| <i>CDC25A</i>                | 3:48229366   | rs146179438 | MVP | Nonsynonymous | A/C | 0.01984  | -0.007085  | 0.010004 | 4.79E-01 |
| <i>TTC39B</i>                | 9:15305378   | rs581080    | MVP | Intron        | C/G | 0.7968   | 0.0068168  | 0.003349 | 4.18E-02 |
| <i>PCK1</i>                  | 20:56140439  | rs41302559  | MVP | Nonsynonymous | A/G | 0.002059 | -0.0067475 | 0.029184 | 8.17E-01 |
| <i>ZC3H4</i>                 | 19:47589895  | rs2303108   | MVP | Intron        | C/T | 0.6653   | 0.006731   | 0.002847 | 1.81E-02 |
| NA                           | 3:156798732  | rs900399    | MVP | Intergenic    | G/A | 0.3824   | 0.006631   | 0.002719 | 1.47E-02 |
| NA                           | 7:130433384  | rs4731702   | MVP | Intergenic    | T/C | 0.4596   | -0.006628  | 0.002745 | 1.58E-02 |
| NA                           | 12:7691134   | rs7136716   | MVP | Intergenic    | G/A | 0.1502   | -0.00607   | 0.003758 | 1.06E-01 |
| NA                           | 1:214159256  | rs340874    | MVP | Intergenic    | C/T | 0.5061   | 0.0059034  | 0.002671 | 2.71E-02 |
| <i>PINX1</i>                 | 8:10683929   | rs11776767  | MVP | Intron        | C/G | 0.3719   | -0.0058878 | 0.002849 | 3.87E-02 |
| <i>PLCB3</i>                 | 11:64031241  | rs35169799  | MVP | Nonsynonymous | T/C | 0.05893  | 0.005833   | 0.005616 | 2.99E-01 |
| <i>MMAB</i>                  | 12:110000193 | rs7134594   | MVP | Intron        | T/C | 0.5261   | 0.005685   | 0.002678 | 3.38E-02 |
| NA                           | 3:185834499  | rs9816226   | MVP | Intergenic    | T/A | 0.8257   | 0.005662   | 0.003499 | 1.06E-01 |
| <i>AKR1C4</i>                | 10:5254847   | rs1832007   | MVP | Intron        | G/A | 0.1381   | -0.0056006 | 0.003874 | 1.48E-01 |
| <i>F2</i>                    | 11:46743247  | rs3136441   | MVP | Intron        | C/T | 0.1514   | 0.0052327  | 0.003993 | 1.90E-01 |
| NA                           | 2:227100698  | rs2972146   | MVP | Intergenic    | T/G | 0.67     | 0.0052182  | 0.002901 | 7.21E-02 |
| <i>ZNF664 ZNF664-FAM101A</i> | 12:124460167 | rs4765127   | MVP | Intron        | T/G | 0.3294   | -0.005202  | 0.004011 | 1.95E-01 |
| <i>MPP3</i>                  | 17:41878166  | rs8077889   | MVP | Downstream    | C/A | 0.2017   | -0.005101  | 0.003288 | 1.21E-01 |
| NA                           | 6:139829666  | rs605066    | MVP | Intergenic    | T/C | 0.5692   | -0.004976  | 0.002963 | 9.31E-02 |
| <i>ARL15</i>                 | 5:53298025   | rs6450176   | MVP | Intron        | A/G | 0.2703   | 0.004588   | 0.003222 | 1.54E-01 |
| NA                           | 13:51221618  | rs797486    | MVP | Intergenic    | A/C | 0.8709   | 0.0043901  | 0.003906 | 2.61E-01 |
| <i>FTO</i>                   | 16:53809247  | rs1121980   | MVP | Intron        | A/G | 0.4278   | 0.0040968  | 0.002687 | 1.27E-01 |
| NA                           | 18:56109859  | rs8099014   | MVP | Intergenic    | A/C | 0.7115   | -0.0040945 | 0.002932 | 1.63E-01 |
| <i>ACP1</i>                  | 2:272203     | rs11553746  | MVP | Nonsynonymous | T/C | 0.3288   | 0.003969   | 0.002834 | 1.61E-01 |
| <i>DNM3</i>                  | 1:172346548  | rs1011731   | MVP | Intron        | A/G | 0.5598   | -0.003828  | 0.00273  | 1.61E-01 |
| <i>FAM13A</i>                | 4:89740128   | rs13133548  | MVP | Intron        | A/G | 0.4835   | 0.003702   | 0.002635 | 1.60E-01 |
| <i>ATG7</i>                  | 3:11400249   | rs2606736   | MVP | Intron        | T/C | 0.599    | -0.003689  | 0.002692 | 1.71E-01 |
| NA                           | 2:165540800  | rs12328675  | MVP | Intergenic    | C/T | 0.1197   | -0.0036588 | 0.00406  | 3.67E-01 |
| <i>MET</i>                   | 7:116358044  | rs38855     | MVP | Intron        | G/A | 0.4624   | -0.003534  | 0.002655 | 1.83E-01 |
| NA                           | 12:20473758  | rs7134375   | MVP | Intergenic    | A/C | 0.4116   | 0.0033477  | 0.002673 | 2.10E-01 |
| <i>STAB1</i>                 | 3:52532118   | rs13326165  | MVP | Intron        | G/A | 0.8052   | 0.0032941  | 0.003352 | 3.26E-01 |
| <i>LOC100507053</i>          | 4:100014805  | rs2602836   | MVP | Intron        | G/A | 0.5796   | 0.003104   | 0.002781 | 2.64E-01 |

|                 |              |            |     |               |     |         |            |          |          |
|-----------------|--------------|------------|-----|---------------|-----|---------|------------|----------|----------|
| <i>RSPO3</i>    | 6:127452935  | rs2745353  | MVP | Intron        | T/C | 0.5253  | 0.0030394  | 0.002636 | 2.49E-01 |
| <i>CMIP</i>     | 16:81534790  | rs2925979  | MVP | Intron        | C/T | 0.698   | -0.002986  | 0.002856 | 2.96E-01 |
| NA              | 5:67714246   | rs4976033  | MVP | Intergenic    | G/A | 0.4248  | 0.002944   | 0.002674 | 2.71E-01 |
| <i>STARD3</i>   | 17:37813856  | rs11869286 | MVP | Intron        | C/G | 0.6304  | 0.0029173  | 0.002914 | 3.17E-01 |
| <i>FNIP1</i>    | 5:131008194  | rs26008    | MVP | Nonsynonymous | C/T | 0.9195  | 0.002729   | 0.00484  | 5.73E-01 |
| <i>CAPN3</i>    | 15:42683787  | rs2412710  | MVP | Intron        | A/G | 0.0214  | 0.002442   | 0.009113 | 7.89E-01 |
| <i>RGS17</i>    | 6:153431125  | rs12055786 | MVP | Intron        | T/C | 0.4369  | -0.0023762 | 0.003009 | 4.30E-01 |
| NA              | 18:57851097  | rs17782313 | MVP | Intergenic    | C/T | 0.2441  | 0.002343   | 0.003084 | 4.47E-01 |
| NA              | 14:105277209 | rs4983559  | MVP | Intergenic    | A/G | 0.5689  | -0.002315  | 0.002693 | 3.90E-01 |
| <i>INSR</i>     | 19:7224431   | rs7248104  | MVP | Intron        | A/G | 0.403   | -0.0022646 | 0.002681 | 3.98E-01 |
| <i>C1orf220</i> | 1:178515312  | rs4650994  | MVP | Intron        | A/G | 0.4916  | 0.002208   | 0.002681 | 4.10E-01 |
| NA              | 11:75455021  | rs499974   | MVP | Intergenic    | A/C | 0.184   | -0.002109  | 0.003449 | 5.41E-01 |
| <i>NBEAL2</i>   | 3:47045846   | rs2305637  | MVP | Nonsynonymous | T/C | 0.1581  | 0.0020226  | 0.004463 | 6.50E-01 |
| <i>PLA2G6</i>   | 22:38546033  | rs5756931  | MVP | Intron        | C/T | 0.3691  | -0.0019876 | 0.002905 | 4.94E-01 |
| NA              | 8:121868551  | rs4871137  | MVP | Intergenic    | T/G | 0.6404  | -0.001985  | 0.002862 | 4.88E-01 |
| <i>FUT8</i>     | 14:65914867  | rs10483776 | MVP | Intron        | G/A | 0.1638  | -0.0018306 | 0.003576 | 6.09E-01 |
| <i>PDE3B</i>    | 11:14852490  | rs1037378  | MVP | Intron        | A/G | 0.5357  | -0.0017962 | 0.002639 | 4.96E-01 |
| <i>FPR3</i>     | 19:52324216  | rs17695224 | MVP | Intron        | A/G | 0.2508  | -0.001773  | 0.003043 | 5.60E-01 |
| <i>RRNAD1</i>   | 1:156700651  | rs12145743 | MVP | Intron        | G/T | 0.3121  | -0.0016557 | 0.003117 | 5.95E-01 |
| <i>CTSB</i>     | 8:11702375   | rs3947     | MVP | Utr3          | A/G | 0.2313  | -0.0016426 | 0.003425 | 6.32E-01 |
| NA              | 7:50305863   | rs4917014  | MVP | Intergenic    | G/T | 0.2985  | -0.001572  | 0.002889 | 5.86E-01 |
| NA              | 12:125261593 | rs838880   | MVP | Intergenic    | T/C | 0.6334  | -0.0014224 | 0.002762 | 6.07E-01 |
| <i>CASP8</i>    | 2:202122995  | rs3769823  | MVP | Nonsynonymous | G/A | 0.6897  | 0.001299   | 0.002881 | 6.52E-01 |
| <i>PSKH1</i>    | 16:67928042  | rs16942887 | MVP | Intron        | A/G | 0.1336  | 0.0012499  | 0.004045 | 7.57E-01 |
| <i>PEPD</i>     | 19:33899065  | rs731839   | MVP | Intron        | A/G | 0.6336  | 0.001228   | 0.002756 | 6.56E-01 |
| <i>PABPC4</i>   | 1:40028180   | rs4660293  | MVP | Intron        | G/A | 0.208   | 0.0009698  | 0.003299 | 7.69E-01 |
| NA              | 10:115789375 | rs7076938  | MVP | Intergenic    | T/C | 0.7253  | -0.0009664 | 0.00295  | 7.43E-01 |
| <i>FRMD5</i>    | 15:44245931  | rs2929282  | MVP | Intron        | T/A | 0.06708 | 0.0009448  | 0.005531 | 8.64E-01 |
| <i>LINGO2</i>   | 9:28414339   | rs10968576 | MVP | Intron        | G/A | 0.2891  | -0.0008863 | 0.002918 | 7.61E-01 |
| <i>RIC8B</i>    | 12:107174646 | rs10861661 | MVP | Intron        | C/A | 0.2332  | 0.0008568  | 0.00323  | 7.91E-01 |
| <i>DHX58</i>    | 17:40257163  | rs2074158  | MVP | Nonsynonymous | C/T | 0.1867  | 0.0008413  | 0.003924 | 8.30E-01 |

|                 |              |             |     |               |     |          |            |          |          |
|-----------------|--------------|-------------|-----|---------------|-----|----------|------------|----------|----------|
| <i>SLC25A30</i> | 13:45970147  | rs138358301 | MVP | Nonsynonymous | G/A | 0.003473 | 0.0007869  | 0.022398 | 9.72E-01 |
| <i>ZC3H12C</i>  | 11:109995944 | rs746463    | MVP | Intron        | T/C | 0.6892   | 0.0007307  | 0.002948 | 8.04E-01 |
| NA              | 3:49971514   | rs7613875   | MVP | Intergenic    | A/C | 0.4941   | 0.0006262  | 0.002723 | 8.18E-01 |
| <i>BAHD1</i>    | 15:40751555  | rs3803357   | MVP | Nonsynonymous | A/C | 0.5429   | 0.0004181  | 0.002685 | 8.76E-01 |
| <i>IGHMBP2</i>  | 11:68703959  | rs622082    | MVP | Nonsynonymous | G/A | 0.3102   | 0.0003493  | 0.002873 | 9.03E-01 |
| NA              | 19:54792761  | rs386000    | MVP | Intergenic    | C/G | 0.2189   | -0.0002399 | 0.004104 | 9.53E-01 |
| NA              | 15:58683366  | rs1532085   | MVP | Intergenic    | G/A | 0.5907   | 0.000173   | 0.00269  | 9.49E-01 |
| <i>GALNT2</i>   | 1:230295691  | rs4846914   | MVP | Intron        | A/G | 0.5506   | 0.0001637  | 0.002833 | 9.54E-01 |

Data are derived from the Global Lipid Genetics Consortium (GLGC)<sup>1</sup>. This 223 SNV polygenic score for LDL-C has been published<sup>2</sup>. Variants are sorted in order of greatest to smallest effect size (beta) for their association with LDL-C levels, starting with the initial significant SNVs identified (Initial Description: GLGC2013)<sup>1</sup> and subsequently then SNVs included in the more recent LDL-C polygenic score<sup>2</sup>. Directionality of the reported effect size is based on the minor allele. Chr: chromosome; Pos: position; EA: effect allele; NEA: non-effect allele; EAF: estimated minor allele frequency; SE: standard error; Utr: untranslated region.

**eTable 4. Baseline Characteristics of UK Biobank Participants at the Time of Study Enrollment**

| Characteristic                       | Genotyping Array Cohort<br>(n=478,428) | Genotyping Array &<br>Exome Sequencing<br>(n=48,741) |
|--------------------------------------|----------------------------------------|------------------------------------------------------|
| <b>Demographics</b>                  |                                        |                                                      |
| Age - mean (SD)                      | 56.6 (8.07)                            | 56.64 (7.99)                                         |
| Female sex - no. (%)                 | 259400 (54.22)                         | 26541 (54.45)                                        |
| European ancestry - no. (%)          | 462236 (96.62)                         | 46836 (96.09)                                        |
| East Asian ancestry - no. (%)        | 11220 (2.35)                           | 1294 (2.65)                                          |
| African ancestry - no. (%)           | 4972 (1.04)                            | 611 (1.25)                                           |
| <b>Biochemistry - mean (SD) / n</b>  |                                        |                                                      |
| Total cholesterol (mg/dL)            | 220.34 (44.25) / 456042                | 220.06 (43.99) / 45739                               |
| Direct LDL-C (mg/dL)                 | 141.03 (34.39) / 455191                | 140.33 (34.14) / 45666                               |
| Apolipoprotein B (mg/dL)             | 103.28 (23.81) / 453762                | 102.93 (23.56) / 45528                               |
| Triglycerides (mg/dL)                | 155.12 (91.04) / 455681                | 150.82 (87.53) / 45690                               |
| HDL-C (mg/dL)                        | 56.03 (14.79) / 417368                 | 56.98 (14.94) / 43048                                |
| Apolipoprotein A1 (mg/dL)            | 153.85 (27.06) / 415065                | 155.51 (27.19) / 42752                               |
| Lipoprotein(a) (mg/dL)               | 18.48 (20.49) / 364458                 | 18.46 (20.51) / 36575                                |
| Hemoglobin A1c (%)                   | 5.45 (0.61) / 455135                   | 5.44 (0.58) / 45493                                  |
| C-reactive protein (mg/dL)           | 0.26 (0.44) / 455044                   | 0.25 (0.43) / 45632                                  |
| <b>Physical Exam - mean (SD) / n</b> |                                        |                                                      |
| Body mass index (kg/m <sup>2</sup> ) | 27.41 (4.78) / 476579                  | 27.40 (4.80) / 48584                                 |
| <b>Medical History - no. (%) / n</b> |                                        |                                                      |
| Angina                               | 15384 (3.23) / 476846                  | 1427 (2.93) / 48666                                  |
| Myocardial infarction                | 11085 (2.32) / 476846                  | 1016 (2.09) / 48666                                  |
| Stroke                               | 7256 (1.52) / 476846                   | 672 (0.14) / 48666                                   |
| Hypertension                         | 128493 (26.95) / 476846                | 12759 (26.22) / 48666                                |
| Diabetes                             | 24524 (5.15) / 476511                  | 2476 (5.09) / 48624                                  |
| Current smoker                       | 50111 (10.53) / 476066                 | 4363 (8.98) / 48582                                  |
| <b>Medications - no. (%) / n</b>     |                                        |                                                      |
| Cholesterol-lowering medication      | 32934 (12.78) / 257611                 | 3366 (12.75) / 26402                                 |
| Antihypertensives                    | 45260 (17.57) / 257611                 | 4473 (16.94) / 26402                                 |
| Insulin                              | 2089 (0.81) / 257611                   | 208 (0.79) / 26402                                   |
| Exogenous hormones                   | 25416 (9.87) / 257611                  | 2651 (10.04) / 26402                                 |

HDL-C: high-density lipoprotein cholesterol; LDL-C: low-density lipoprotein cholesterol; SD: standard deviation.

**eTable 5. FH-causing Variants Identified in the *LDLR*, *APOB*, and *PCSK9* Genes**

| Gene        | Chr:Pos     | Ref/Alt | rsID         | Variant            | ClinVar Significance                         | n  |
|-------------|-------------|---------|--------------|--------------------|----------------------------------------------|----|
| <i>LDLR</i> | 19:11129602 | G/A     | rs137853964  | missense_variant   | Conflicting_interpretations_of_pathogenicity | 16 |
| <i>LDLR</i> | 19:11111538 | A/C     | rs138315511  | missense_variant   | Conflicting_interpretations_of_pathogenicity | 15 |
| <i>LDLR</i> | 19:11105414 | G/A     | rs139089530  | missense_variant   | Uncertain_significance                       | 11 |
| <i>LDLR</i> | 19:11110660 | G/A     | rs746834464  | missense_variant   | Pathogenic/Likely_pathogenic                 | 11 |
| <i>LDLR</i> | 19:11107506 | A/C     | rs761765254  | missense_variant   | Likely_pathogenic                            | 7  |
| <i>LDLR</i> | 19:11129564 | G/A     | rs5928       | missense_variant   | Conflicting_interpretations_of_pathogenicity | 7  |
| <i>LDLR</i> | 19:11100340 | C/T     | rs376207800  | missense_variant   | Conflicting_interpretations_of_pathogenicity | 6  |
| <i>LDLR</i> | 19:11102774 | G/A     | rs144172724  | missense_variant   | Pathogenic/Likely_pathogenic                 | 6  |
| <i>LDLR</i> | 19:11120436 | C/T     | rs28942084   | missense_variant   | Pathogenic/Likely_pathogenic                 | 6  |
| <i>LDLR</i> | 19:11120501 | G/A     | rs879255142  | missense_variant   | Likely_pathogenic                            | 6  |
| <i>LDLR</i> | 19:11113620 | G/A     | rs139624145  | missense_variant   | Conflicting_interpretations_of_pathogenicity | 5  |
| <i>LDLR</i> | 19:11120483 | G/A     | rs368838866  | missense_variant   | Conflicting_interpretations_of_pathogenicity | 5  |
| <i>LDLR</i> | 19:11120488 | G/A     | rs140731590  | missense_variant   | Conflicting_interpretations_of_pathogenicity | 5  |
| <i>LDLR</i> | 19:11116141 | G/A     | rs759876319  | missense_variant   | Pathogenic/Likely_pathogenic                 | 4  |
| <i>LDLR</i> | 19:11116970 | C/A     | rs1410295777 | missense_variant   | Pathogenic                                   | 4  |
| <i>LDLR</i> | 19:11120157 | C/T     | rs373570349  | stop_gained        | Conflicting_interpretations_of_pathogenicity | 4  |
| <i>LDLR</i> | 19:11129633 | A/G     | rs150631538  | missense_variant   |                                              | 4  |
| <i>LDLR</i> | 19:11131384 | AAGAC/A | rs773717642  | frameshift_variant |                                              | 4  |
| <i>LDLR</i> | 19:11100237 | G/A     | rs551747280  | missense_variant   | Likely_pathogenic                            | 3  |
| <i>LDLR</i> | 19:11102705 | C/T     | rs370860696  | missense_variant   | Likely_pathogenic                            | 3  |
| <i>LDLR</i> | 19:11102765 | G/A     | rs750474121  | missense_variant   | Likely_pathogenic                            | 3  |
| <i>LDLR</i> | 19:11105408 | G/A     | rs200727689  | missense_variant   | Pathogenic/Likely_pathogenic                 | 3  |
| <i>LDLR</i> | 19:11105568 | A/G     | rs373822756  | missense_variant   | Pathogenic/Likely_pathogenic                 | 3  |
| <i>LDLR</i> | 19:11110759 | C/T     | rs769737896  | stop_gained        | Pathogenic                                   | 3  |
| <i>LDLR</i> | 19:11116873 | C/T     | rs185098634  | missense_variant   | Conflicting_interpretations_of_pathogenicity | 3  |
| <i>LDLR</i> | 19:11120114 | T/C     | rs141155833  | missense_variant   | Likely_pathogenic                            | 3  |
| <i>LDLR</i> | 19:11120212 | C/A     | rs762815611  | missense_variant   | Conflicting_interpretations_of_pathogenicity | 3  |
| <i>LDLR</i> | 19:11120454 | C/T     | rs369943481  | missense_variant   | Uncertain_significance                       | 3  |
| <i>LDLR</i> | 19:11120480 | G/A     | rs375009082  | missense_variant   | Uncertain_significance                       | 3  |

|      |             |        |              |                                                                                          |                                              |   |
|------|-------------|--------|--------------|------------------------------------------------------------------------------------------|----------------------------------------------|---|
| LDLR | 19:11129510 | C/T    | rs755033580  | stop_gained                                                                              |                                              | 3 |
| LDLR | 19:11102732 | T/G    | rs121908025  | missense_variant                                                                         | Pathogenic/Likely_pathogenic                 | 2 |
| LDLR | 19:11102739 | G/A    | rs875989894  | missense_variant                                                                         | Pathogenic/Likely_pathogenic                 | 2 |
| LDLR | 19:11105556 | ATGG/A | rs121908027  | disruptive_inframe_deletion                                                              | Pathogenic/Likely_pathogenic                 | 2 |
| LDLR | 19:11105585 | GAC/G  | rs387906305  | frameshift_variant                                                                       | Pathogenic/Likely_pathogenic                 | 2 |
| LDLR | 19:11106588 | G/A    | rs768563000  | missense_variant                                                                         | Conflicting_interpretations_of_pathogenicity | 2 |
| LDLR | 19:11110714 | G/A    | rs544453230  | missense_variant                                                                         | Conflicting_interpretations_of_pathogenicity | 2 |
| LDLR | 19:11113329 | C/T    | rs368562025  | missense_variant                                                                         | Conflicting_interpretations_of_pathogenicity | 2 |
| LDLR | 19:11113705 | C/T    | rs755154048  | missense_variant                                                                         | Likely_pathogenic                            | 2 |
| LDLR | 19:11113751 | T/G    | rs763884010  | missense_variant                                                                         |                                              | 2 |
| LDLR | 19:11116095 | T/G    | rs875989924  | missense_variant&<br>splice_region_variant                                               | Uncertain_significance                       | 2 |
| LDLR | 19:11116198 | A/G    | rs758194385  | missense_variant                                                                         | Likely_pathogenic                            | 2 |
| LDLR | 19:11120143 | C/T    | rs746118995  | missense_variant                                                                         | Pathogenic/Likely_pathogenic                 | 2 |
| LDLR | 19:11123315 | C/T    | rs138477254  | missense_variant                                                                         | Conflicting_interpretations_of_pathogenicity | 2 |
| LDLR | 19:11129571 | G/C    | rs1399689294 | missense_variant                                                                         | Conflicting_interpretations_of_pathogenicity | 2 |
| LDLR | 19:11129669 | C/T    | rs377437226  | stop_gained&<br>splice_region_variant                                                    | Uncertain_significance                       | 2 |
| LDLR | 19:11100272 | CA/C   | rs879254413  | frameshift_variant                                                                       | Pathogenic                                   | 1 |
| LDLR | 19:11100294 | G/A    | rs778284147  | missense_variant                                                                         | Conflicting_interpretations_of_pathogenicity | 1 |
| LDLR | 19:11100328 | A/T    |              | missense_variant                                                                         |                                              | 1 |
| LDLR | 19:11102683 | CG/C   | rs1412805126 | frameshift_variant                                                                       | Pathogenic                                   | 1 |
| LDLR | 19:11102699 | G/T    | rs574337291  | missense_variant                                                                         | Conflicting_interpretations_of_pathogenicity | 1 |
| LDLR | 19:11102714 | C/T    | rs730882078  | missense_variant                                                                         | Conflicting_interpretations_of_pathogenicity | 1 |
| LDLR | 19:11102785 | TCG/T  | rs875989896  | frameshift_variant&<br>splice_donor_variant&<br>splice_region_variant&<br>intron_variant | Pathogenic                                   | 1 |
| LDLR | 19:11102787 | G/C    | rs112029328  | splice_donor_variant&<br>intron_variant                                                  | Pathogenic/Likely_pathogenic                 | 1 |
| LDLR | 19:11105249 | C/T    | rs774723292  | missense_variant                                                                         | Conflicting_interpretations_of_pathogenicity | 1 |
| LDLR | 19:11105407 | C/A    | rs752596535  | stop_gained                                                                              | Pathogenic/Likely_pathogenic                 | 1 |
| LDLR | 19:11105415 | A/G    | rs533896621  | missense_variant                                                                         |                                              | 1 |
| LDLR | 19:11105526 | G/A    | rs759737884  | missense_variant                                                                         |                                              | 1 |
| LDLR | 19:11105587 | C/G    | rs121908028  | missense_variant                                                                         | Pathogenic/Likely_pathogenic                 | 1 |

|      |             |     |              |                                            |                                              |   |
|------|-------------|-----|--------------|--------------------------------------------|----------------------------------------------|---|
| LDLR | 19:11105588 | G/T | rs121908029  | stop_gained                                | Pathogenic/Likely_pathogenic                 | 1 |
| LDLR | 19:11106592 | T/C | rs748131256  | missense_variant                           | Likely_pathogenic                            | 1 |
| LDLR | 19:11106593 | C/A |              | missense_variant                           |                                              | 1 |
| LDLR | 19:11106601 | C/G | rs1208667598 | missense_variant                           | Pathogenic                                   | 1 |
| LDLR | 19:11106639 | C/T | rs200990725  | missense_variant                           | Conflicting_interpretations_of_pathogenicity | 1 |
| LDLR | 19:11106668 | T/A | rs139043155  | missense_variant                           | Conflicting_interpretations_of_pathogenicity | 1 |
| LDLR | 19:11106685 | A/C | rs202213054  | missense_variant&<br>splice_region_variant | Uncertain_significance                       | 1 |
| LDLR | 19:11107433 | G/A | rs375495026  | missense_variant                           | Likely_pathogenic                            | 1 |
| LDLR | 19:11107440 | G/C |              | missense_variant                           |                                              | 1 |
| LDLR | 19:11107461 | G/A | rs879254707  | missense_variant                           | Likely_pathogenic                            | 1 |
| LDLR | 19:11107481 | C/T | rs151207122  | missense_variant                           | Conflicting_interpretations_of_pathogenicity | 1 |
| LDLR | 19:11107486 | C/G | rs875989909  | missense_variant                           | Pathogenic/Likely_pathogenic                 | 1 |
| LDLR | 19:11110690 | C/T | rs747507019  | missense_variant                           | Conflicting_interpretations_of_pathogenicity | 1 |
| LDLR | 19:11111514 | A/G | rs755449669  | missense_variant&<br>splice_region_variant | Likely_pathogenic                            | 1 |
| LDLR | 19:11111609 | G/T | rs1402951356 | missense_variant                           | Uncertain_significance                       | 1 |
| LDLR | 19:11111619 | C/T | rs149227308  | missense_variant                           | Conflicting_interpretations_of_pathogenicity | 1 |
| LDLR | 19:11113287 | C/A | rs875989918  | missense_variant                           | Likely_pathogenic                            | 1 |
| LDLR | 19:11113307 | C/T | rs121908043  | missense_variant                           | Pathogenic/Likely_pathogenic                 | 1 |
| LDLR | 19:11113308 | G/A | rs552422789  | missense_variant                           | Conflicting_interpretations_of_pathogenicity | 1 |
| LDLR | 19:11113313 | G/A | rs137943601  | missense_variant                           | Conflicting_interpretations_of_pathogenicity | 1 |
| LDLR | 19:11113343 | G/A | rs869320651  | missense_variant                           | Likely_pathogenic                            | 1 |
| LDLR | 19:11113376 | G/A | rs28942078   | missense_variant                           | Pathogenic/Likely_pathogenic                 | 1 |
| LDLR | 19:11113382 | G/C | rs28942079   | missense_variant                           | Likely_pathogenic                            | 1 |
| LDLR | 19:11113650 | G/A | rs373646964  | missense_variant                           | Conflicting_interpretations_of_pathogenicity | 1 |
| LDLR | 19:11113678 | C/T | rs755667663  | missense_variant                           | Pathogenic/Likely_pathogenic                 | 1 |
| LDLR | 19:11113684 | C/A | rs967205800  | missense_variant                           |                                              | 1 |
| LDLR | 19:11113743 | G/A | rs28942080   | missense_variant                           | Pathogenic/Likely_pathogenic                 | 1 |
| LDLR | 19:11116099 | T/A | rs779913921  | missense_variant                           |                                              | 1 |
| LDLR | 19:11116132 | T/A |              | missense_variant                           |                                              | 1 |
| LDLR | 19:11116144 | G/T | rs28942081   | missense_variant                           | Likely_pathogenic                            | 1 |
| LDLR | 19:11116898 | T/C | rs875989930  | missense_variant                           | Likely_pathogenic                            | 1 |



|       |             |        |              |                                        |                                              |   |
|-------|-------------|--------|--------------|----------------------------------------|----------------------------------------------|---|
| LDLR  | 19:11116900 | C/T    | rs730882109  | missense_variant                       | Conflicting_interpretations_of_pathogenicity | 1 |
| LDLR  | 19:11116925 | ACGG/A | rs1221971156 | disruptive_inframe_deletion            |                                              | 1 |
| LDLR  | 19:11116936 | C/T    | rs373371572  | missense_variant                       | Conflicting_interpretations_of_pathogenicity | 1 |
| LDLR  | 19:11116988 | C/T    | rs377449975  | missense_variant                       | Pathogenic                                   | 1 |
| LDLR  | 19:11120094 | C/T    |              | stop_gained&splice_region_variant      |                                              | 1 |
| LDLR  | 19:11120106 | G/T    | rs875989933  | missense_variant                       | Likely_pathogenic                            | 1 |
| LDLR  | 19:11120143 | C/A    |              | missense_variant                       |                                              | 1 |
| LDLR  | 19:11120144 | G/A    | rs754536745  | missense_variant                       | Conflicting_interpretations_of_pathogenicity | 1 |
| LDLR  | 19:11120370 | G/A    | rs879255102  | missense_variant&splice_region_variant | Likely_pathogenic                            | 1 |
| LDLR  | 19:11120408 | G/A    | rs745753810  | missense_variant                       | Conflicting_interpretations_of_pathogenicity | 1 |
| LDLR  | 19:11120411 | T/C    | rs775092314  | missense_variant                       | Pathogenic/Likely_pathogenic                 | 1 |
| LDLR  | 19:11120419 | T/A    | rs760436036  | stop_gained                            | Pathogenic                                   | 1 |
| LDLR  | 19:11120424 | G/C    | rs201637900  | missense_variant                       | Likely_pathogenic                            | 1 |
| LDLR  | 19:11120441 | A/T    | rs1060499932 | missense_variant                       | Uncertain_significance                       | 1 |
| LDLR  | 19:11120442 | T/TC   | rs137853965  | frameshift_variant                     | Pathogenic                                   | 1 |
| LDLR  | 19:11120484 | G/T    |              | missense_variant                       |                                              | 1 |
| LDLR  | 19:11120488 | G/C    | rs140731590  | missense_variant                       |                                              | 1 |
| LDLR  | 19:11129582 | G/A    |              | missense_variant                       |                                              | 1 |
| LDLR  | 19:11129602 | G/T    | rs137853964  | missense_variant                       | Likely_pathogenic                            | 1 |
| LDLR  | 19:11129609 | A/T    |              | stop_gained                            |                                              | 1 |
| LDLR  | 19:11129623 | G/A    |              | missense_variant                       |                                              | 1 |
| APOB  | 2:21038086  | C/A    | rs766243954  | stop_gained                            | Pathogenic                                   | 3 |
| APOB  | 2:21006129  | T/C    | rs762028704  | missense_variant                       | Pathogenic                                   | 2 |
| APOB  | 2:21002392  | CAT/C  | rs760832994  | frameshift_variant                     | Pathogenic                                   | 1 |
| APOB  | 2:21006128  | G/C    | rs150312765  | missense_variant                       | Pathogenic                                   | 1 |
| PCSK9 | 1:55043921  | C/T    | rs185392267  | missense_variant                       | Pathogenic                                   | 3 |
| PCSK9 | 1:55058543  | C/G    | rs772677312  | structural_interaction_variant         | Likely_pathogenic                            | 3 |
| PCSK9 | 1:55039995  | C/G    | rs11583680   | missense_variant                       | Pathogenic                                   | 2 |
| PCSK9 | 1:55058570  | C/T    | rs761767572  | structural_interaction_variant         | Pathogenic                                   | 2 |
| PCSK9 | 1:55052364  | G/A    | rs793888521  | missense_variant                       | Likely_pathogenic                            | 1 |
| PCSK9 | 1:55052650  | G/A    | rs768795323  | missense_variant&splice_region_variant | Pathogenic                                   | 1 |

|       |            |     |             |                                |                              |   |
|-------|------------|-----|-------------|--------------------------------|------------------------------|---|
| PCSK9 | 1:55057454 | G/T | rs137852912 | structural_interaction_variant | Pathogenic/Likely_pathogenic | 1 |
|-------|------------|-----|-------------|--------------------------------|------------------------------|---|

Chr: chromosome; Pos: position; Ref/Alt: reference/alternative.

**eTable 6. Baseline Characteristics of UK Biobank Participants in the Exome Sequencing Cohort Stratified by Monogenic FH**

| Characteristic                       | No monogenic FH (n=48,464) | Monogenic FH (n=277) | p      |
|--------------------------------------|----------------------------|----------------------|--------|
| <b>Demographics</b>                  |                            |                      |        |
| Age - mean (SD)                      | 56.64 (7.99)               | 57.08 (7.87)         | 0.39   |
| Female sex - no. (%)                 | 26384 (54.44)              | 157 (56.68)          | 0.49   |
| European ancestry - no. (%)          | 46576 (96.10)              | 260 (93.86)          | 0.08   |
| East Asian ancestry - no. (%)        | 1283 (2.65)                | 11 (3.97)            | 0.24   |
| African ancestry - no. (%)           | 605 (1.25)                 | 6 (2.17)             | 0.27   |
| <b>Biochemistry - mean (SD) / n</b>  |                            |                      |        |
| Total cholesterol (mg/dL)            | 219.99 (43.89) / 45482     | 232.91 (57.43) / 257 | <0.001 |
| Direct LDL-C (mg/dL)                 | 140.21 (34.00) / 45410     | 161.15 (49.14) / 256 | <0.001 |
| Apolipoprotein B (mg/dL)             | 102.88 (23.54) / 45275     | 110.86 (26.78) / 253 | <0.001 |
| Triglycerides (mg/dL)                | 150.91 (87.59) / 45435     | 134.55 (75.22) / 255 | <0.001 |
| HDL-C (mg/dL)                        | 56.97 (14.94) / 42804      | 57.4 (14.58) / 244   | 0.52   |
| Apolipoprotein A1 (mg/dL)            | 155.52 (27.19) / 42508     | 152.83 (25.8) / 244  | 0.29   |
| Lipoprotein(a) (mg/dL)               | 18.46 (20.52) / 36381      | 18.86 (18.74) / 194  | 0.12   |
| Hemoglobin A1c (%)                   | 5.44 (0.58) / 45236        | 5.48 (0.56) / 257    | 0.06   |
| C-reactive protein (mg/dL)           | 0.25 (0.43) / 45377        | 0.25 (0.44) / 255    | 0.05   |
| <b>Physical Exam - mean (SD) / n</b> |                            |                      |        |
| Body mass index (kg/m <sup>2</sup> ) | 27.40 (4.80) / 48308       | 27.59 (4.97) / 276   | 0.56   |
| <b>Medical History - no. (%) / n</b> |                            |                      |        |
| Angina                               | 1411 (2.92) / 48391        | 16 (5.82) / 275      | 0.008  |
| Myocardial infarction                | 999 (2.06) / 48391         | 17 (6.18) / 275      | <0.001 |
| Stroke                               | 669 (1.38) / 48391         | 3 (0.01) / 275       | 0.88   |
| Hypertension                         | 12686 (26.22) / 48391      | 73 (26.55) / 275     | 0.96   |
| Diabetes                             | 2460 (5.09) / 48347        | 16 (5.78) / 277      | 0.70   |
| Current smoker                       | 4347 (9.00) / 48305        | 16 (5.78) / 277      | 0.08   |
| <b>Medications - no. (%) / n</b>     |                            |                      |        |
| Cholesterol-lowering medication      | 3309 (12.61) / 26245       | 57 (36.31) / 157     | <0.001 |
| Antihypertensives                    | 4439 (16.91) / 26245       | 34 (21.66) / 157     | 0.14   |
| Insulin                              | 208 (0.79) / 26245         | 0 (0) / 157          | 0.50   |
| Exogenous hormones                   | 2643 (10.07) / 26245       | 8 (5.10) / 157       | 0.05   |

HDL-C: high-density lipoprotein cholesterol; ; LDL-C: low-density lipoprotein cholesterol; SD: standard deviation.

**eFigure 1. Classification of Patients by Genetic Ancestry Superpopulation**

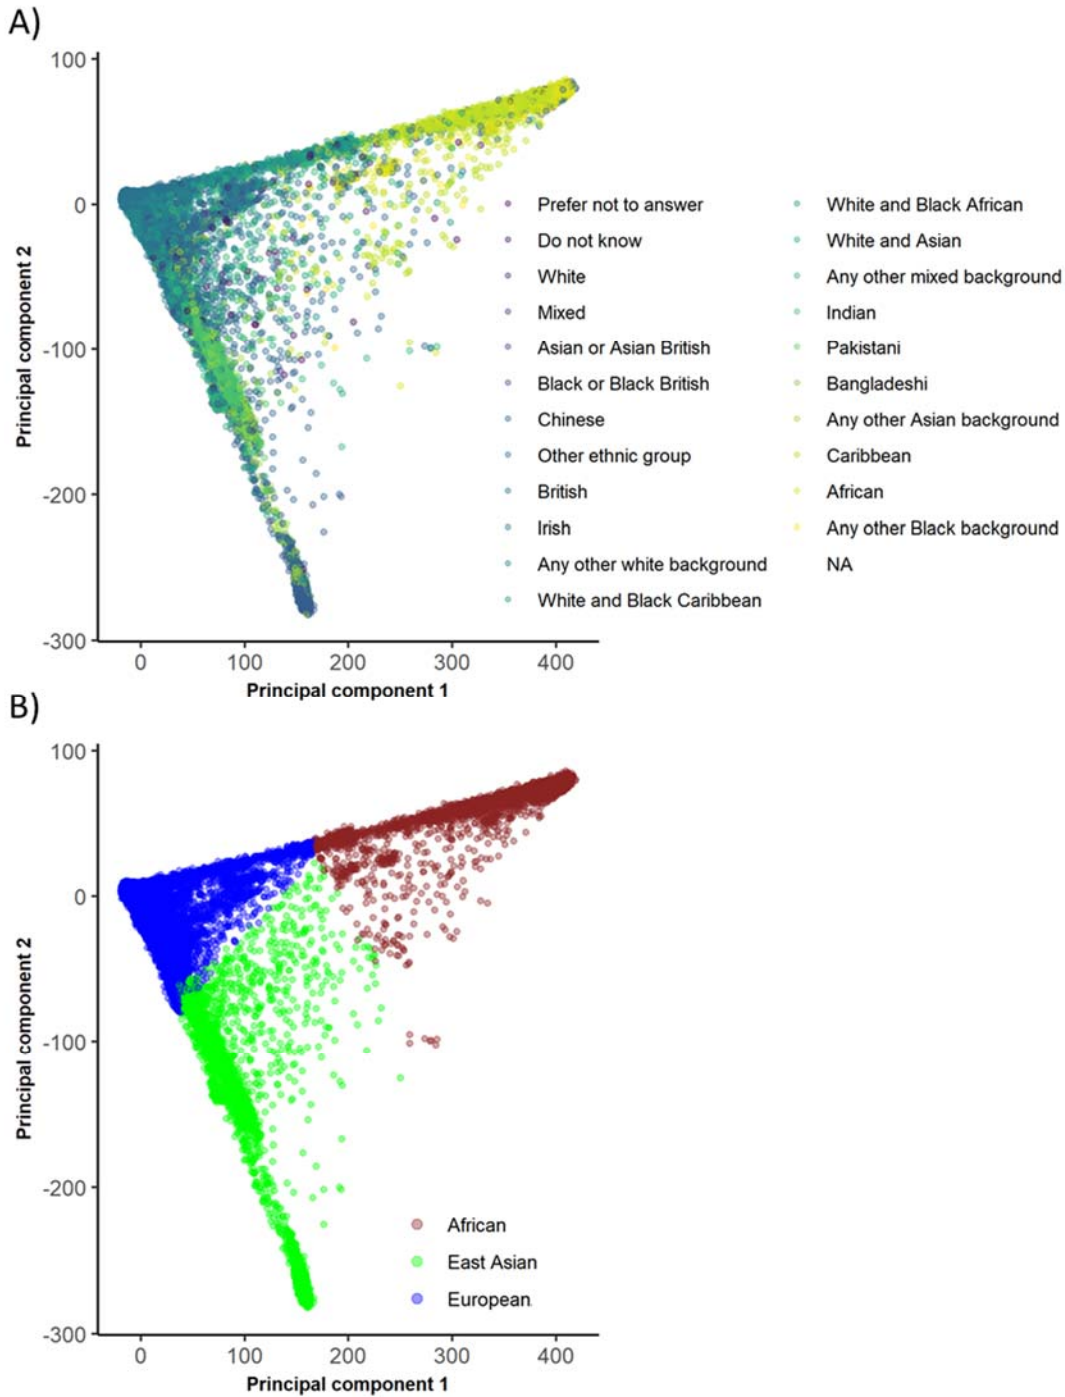

(A) The first 2 principal components of genetic ancestry for individuals from the UK Biobank genotyping array cohort are displayed and colored by (A) self-reported ancestry and (B) clustering of individuals into African, East Asian, and European superpopulations.

**eFigure 2. Percent Variance in LDL-C Levels Explained by Single-Nucleotide Variants (SNVs) in the LDL-C Polygenic Score**

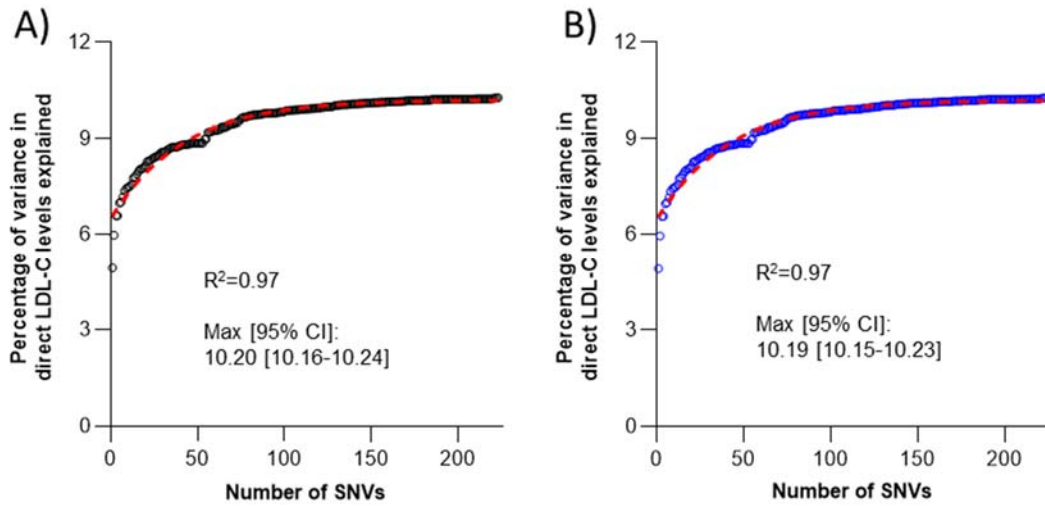

The percent variance of LDL-C levels explained by the LDL-C polygenic score is displayed for the stepwise addition of the 223 SNVs into multivariable linear regression models with LDL-C levels as the dependent variable. Linear regression models were adjusted for age, sex, the first 4 principal components of genetic ancestry, and genotyping array and batch and included (A) all individuals (n= 239,826) and (B) individuals of European genetic ancestry (238,058) with no missing SNVs from the 223 SNV LDL-C polygenic score. SNVs were added in the order displayed in Online-Only Table 2. The red dashed line depicts the exponential plateau model of the data.

**eFigure 3. Measured Levels of LDL-C Versus Decile of LDL-C Polygenic Score Percentile**

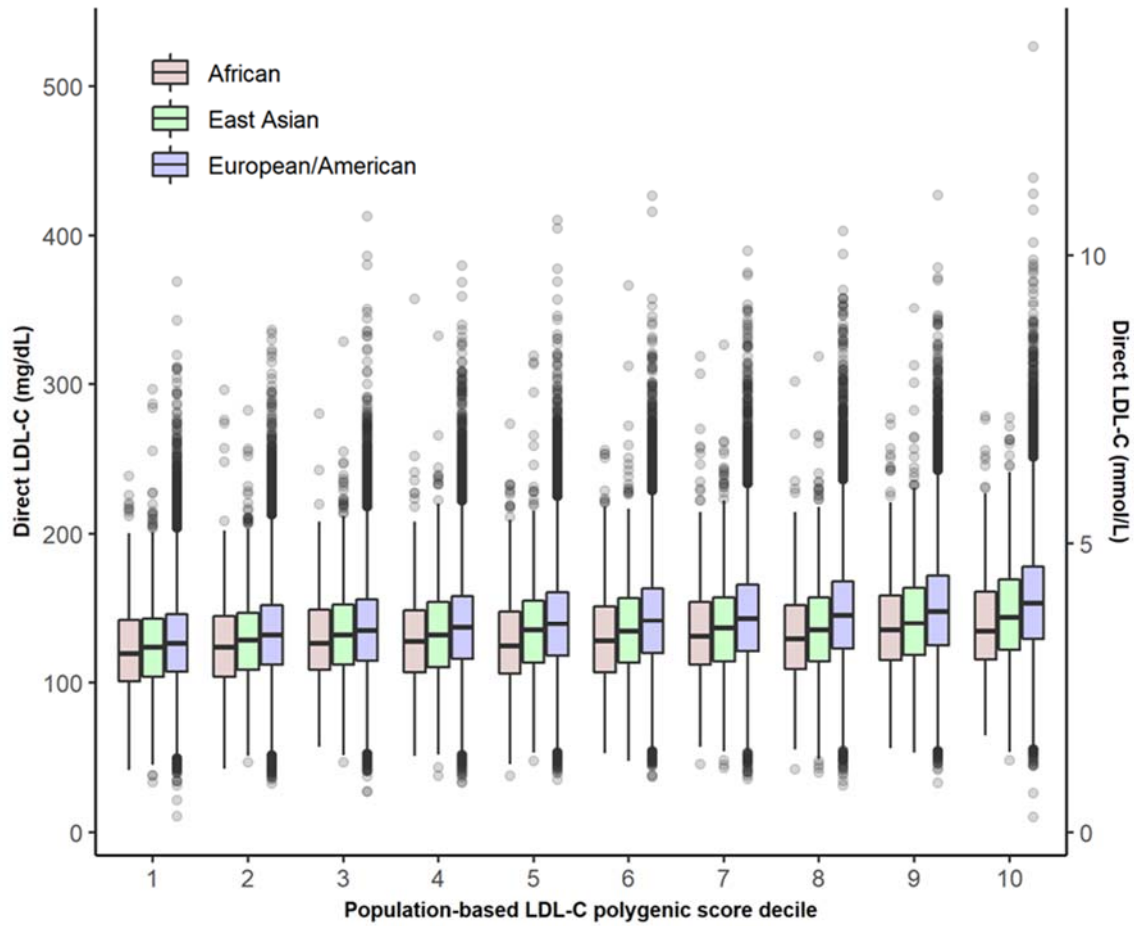

Boxplots display the median, interquartile range, and minimum to maximum of direct LDL-C levels versus the superpopulation-specific LDL-C polygenic score percentile.

**eFigure 4. LDL-C Polygenic Scores are Associated With Risk of CVD Among the East Asian and European Superpopulations**

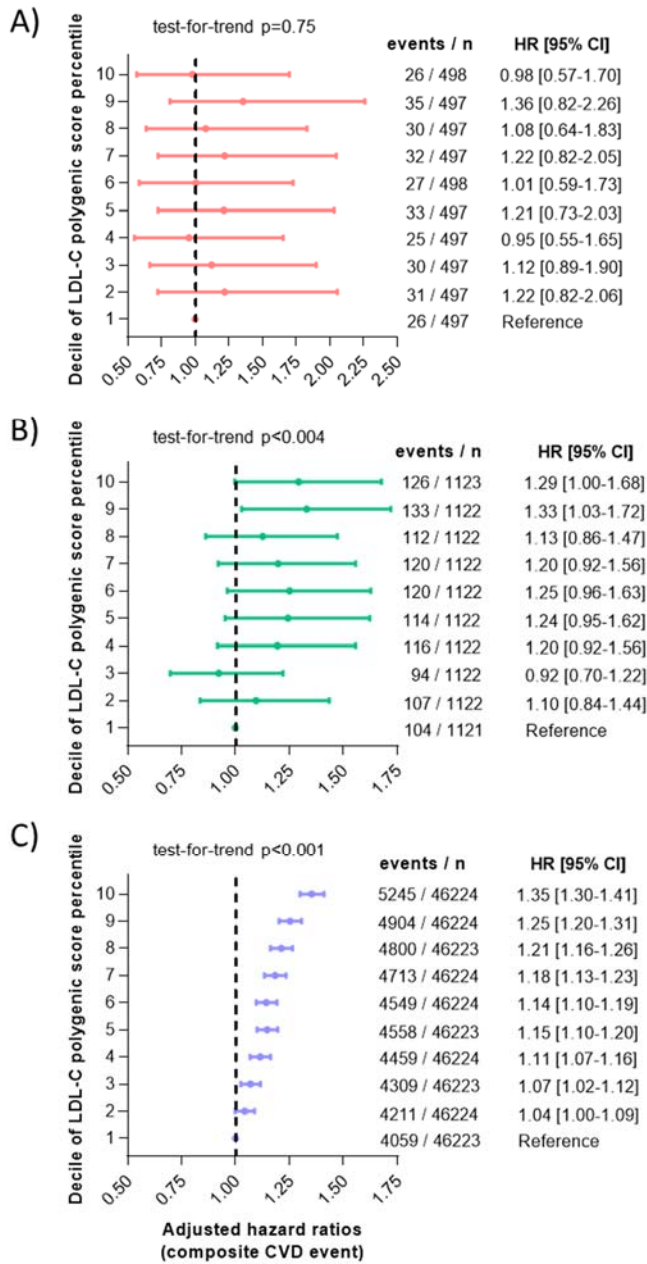

The adjusted hazard ratios  $\pm$  95% confidence intervals for composite CVD events of myocardial infarction, coronary or carotid revascularization, stroke, or all-cause mortality are displayed for each decile of LDL-C polygenic score percentile are stratified by (A) African, (B) East Asian, and (C) Europeans superpopulations. Hazard ratios were adjusted for age, sex, genotyping array/batch, and the first 4 principal components of ancestry.

**eFigure 5. Impact of ClinVar Pathogenic Versus Predicted FH-causing Variants on Premature CVD Events**

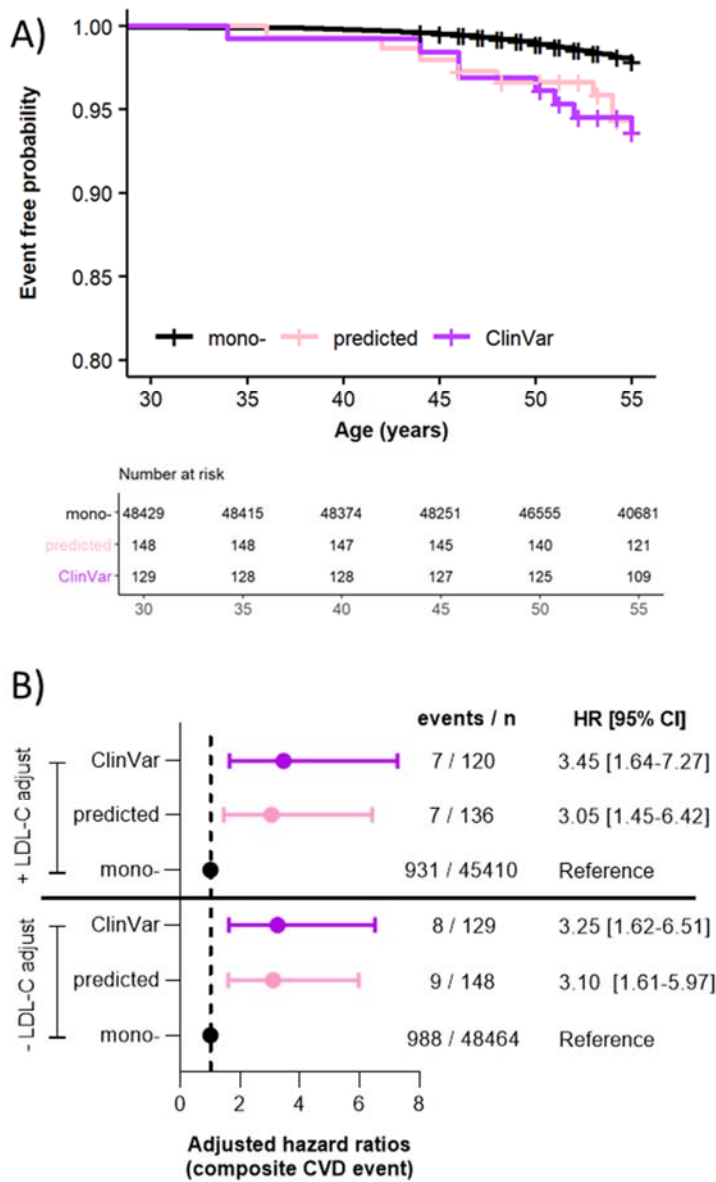

(A) Time-to-first-event analyses are displayed for premature CVD events (experienced at age 55 years-of-age or younger), including myocardial infarction, coronary or carotid revascularization, stroke, or all-cause mortality. Individuals were stratified based on the rank order groupings of FH-causing variants classified as ‘pathogenic’ or ‘likely pathogenic’ in ClinVar, predicted FH-causing variants, and no identified FH-causing variants. (B) Hazard ratios  $\pm$  95% confidence intervals are displayed for composite CVD events with or without adjustment for LDL-C levels. All hazard ratios were adjusted for age, sex, genotyping array/batch, and the first 4 principal components of ancestry.



**eFigure 6. Impact of Monogenic FH-causing Variants on CVD Events**

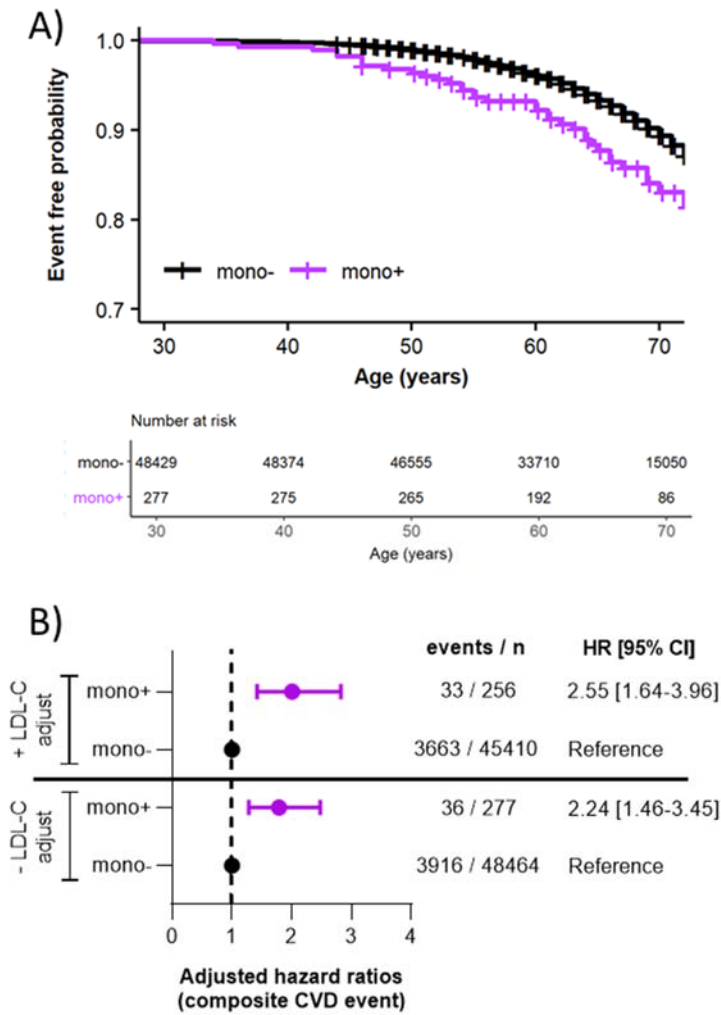

(A) Time-to-first-event analyses are displayed for composite CVD events, including myocardial infarction, coronary or carotid revascularization, stroke, or all-cause mortality. Individuals were stratified based on those that carried a monogenic FH-causing variant versus those that did not carry a monogenic FH-causing variant. (B) Hazard ratios  $\pm$  95% confidence intervals are displayed for composite CVD events with or without adjustment for LDL-C levels. All hazard ratios were adjusted for age, sex, genotyping array/batch, and the first 4 principal components of ancestry.

**eFigure 7. Hypercholesterolemia is Underdiagnosed and Undertreated**

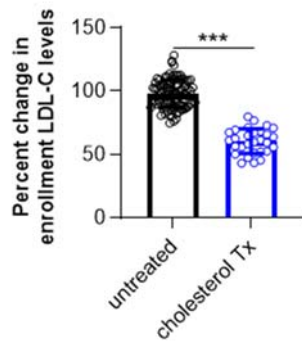

There were 128 individuals with LDL-C levels  $\geq 193.35$  mg/dL (5 mmol/L) that were not receiving cholesterol-lowering medication at enrollment and had follow-up data available. At follow-up, 29 of these individuals reported receiving cholesterol-lowering medication (cholesterol Tx) and 99 of these individuals reported that they were not taking cholesterol-lowering medication (untreated). The intraindividual percent change in follow-up LDL-C levels are depicted relative to their levels measured at enrollment. Data are displayed as means  $\pm$  SD. Tx: treatment with cholesterol-lowering medication. \*\*\* $p < 0.001$ .

## eReferences

1. Willer CJ, Schmidt EM, Sengupta S, et al; Global Lipids Genetics Consortium. Discovery and refinement of loci associated with lipid levels. *Nat Genet.* 2013;45(11):1274-1283. Medline:24097068 doi:10.1038/ng.2797
2. Klarin D, Damrauer SM, Cho K, et al; Global Lipids Genetics Consortium; Myocardial Infarction Genetics 18 (MIGen) Consortium; Geisinger-Regeneron DiscovEHR Collaboration; VA Million Veteran Program. Genetics of blood lipids among ~300,000 multi-ethnic participants of the Million Veteran Program. *Nat Genet.* 2018;50(11):1514-1523. Medline:30275531 doi:10.1038/s41588-018-0222-9
